# Supplementary material
Source: publisher figshare collection journal article supplement (https://acs.figshare.com/ndownloader/files/26204938)
Supplement: Supplementary file 1 [file 26204938]

## Supporting information

### Surface Engineering of Perovskites for Rechargeable Zinc-air Battery Application

*Maria Christy<sup>a</sup>, Hashikaa Rajan<sup>a</sup>, Hwawoo Lee <sup>a</sup>, Iqra Rabani<sup>c</sup>, Sang Man Koo<sup>d</sup>, Sung Chul Yi*

*a, b,\**

<sup>a</sup>Department of Chemical Engineering, Hanyang University, 222 Wangsimni ro, Seongdong-gu, Seoul 04763, Republic of Korea.

<sup>b</sup>Department of Hydrogen and Fuel cell technology, Hanyang University, 222 Wangsimni-ro, Seongdong-gu, Seoul 04763, Republic of Korea.

<sup>c</sup>Department of Nanotechnology and Advanced Materials Engineering, Sejong University, Seoul 05006, Republic of Korea.

<sup>d</sup>Department of Chemical Engineering, Hanyang University, 222 Wangsimni ro, Seongdong-gu, Seoul 04763, Republic of Korea.

\*Corresponding author:

Email: [scyi@hanyang.ac.kr](mailto:scyi@hanyang.ac.kr) (Prof. Sung Chul Yi)

## Contents

|                                                      |    |
|------------------------------------------------------|----|
| XPS survey and XRD                                   | 3  |
| High-resolution XPS Figures                          | 4  |
| FESEM micrographs                                    | 5  |
| HRTEM micrographs                                    | 6  |
| HRTEM micrographs                                    | 7  |
| BET N <sub>2</sub> -adsorption desorption isotherms  | 8  |
| Zinc air battery performance                         | 9  |
| Zinc air battery performance of different composites | 10 |
| ORR polarization                                     | 11 |
| ORR polarization comparison                          | 12 |
| Chronoamperometry                                    | 13 |
| OER polarization comparison                          | 14 |
| ORR and OER polarization                             | 14 |
| ECSA                                                 | 15 |
| Table 1                                              | 16 |
| Table 2                                              | 17 |

**Figure S1**

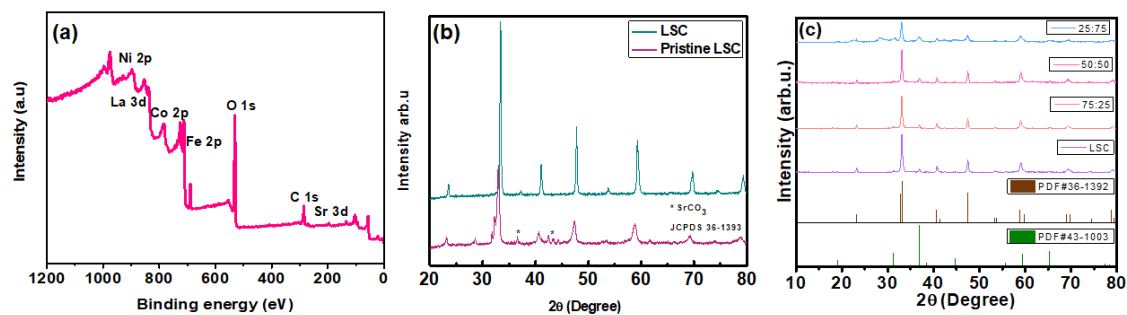

Figure S1. (a) XPS survey of LSC/LDH (75/25); (b) XRD patterns of pristine and LSC prepared by sintering at 1000° and (c) XRD patterns of LSC/LDH (50/50), LSC/LDH (25/75) and LSC/LDH (75/25) with respect to LSC.

**Figure S2**

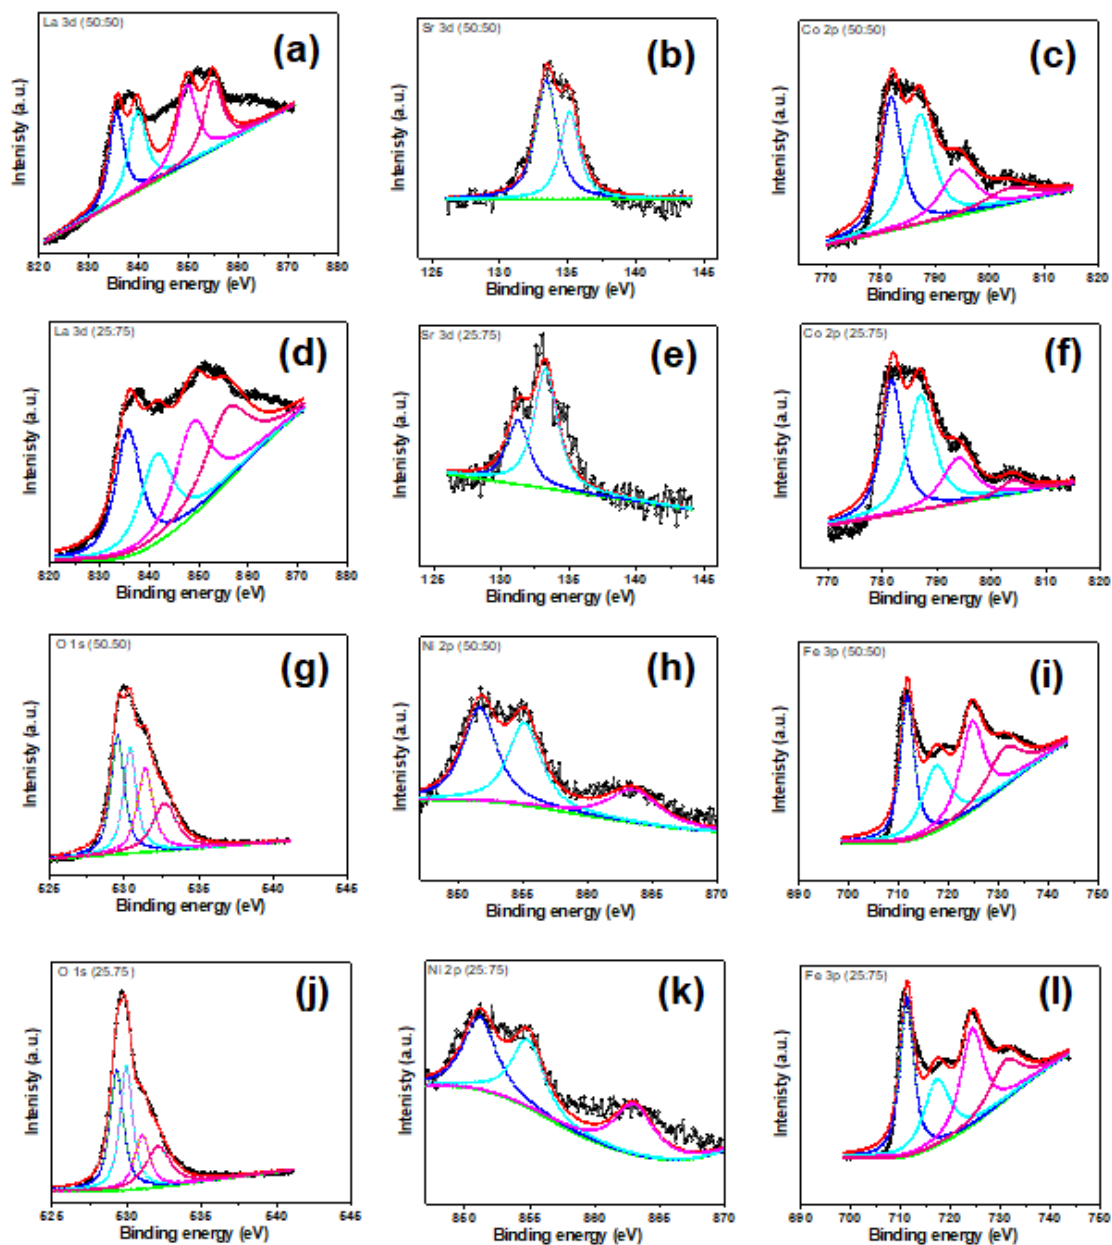

Figure S2. High-resolution deconvolution peaks of (a-f) LSC/LDH (50/50) and (g-l) LSC/LDH (25/75) from XPS measurement.

**Figure S3**

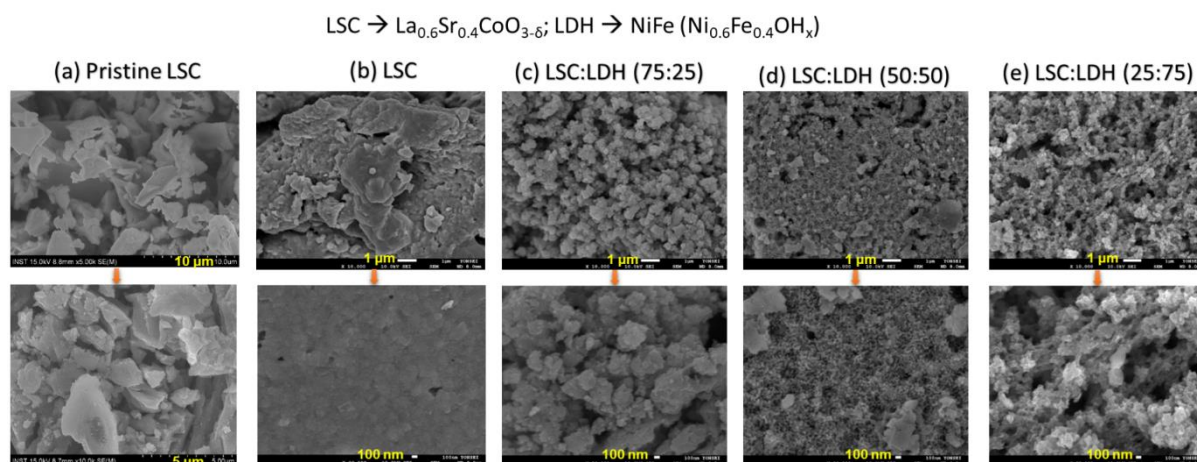

Figure S3. FESEM micrographs of (a) as-synthesized pristine LSC; (b) LSC; (c) LSC/LDH (75/25), (d) LSC/LDH (50/50) and (e) LSC/LDH (25/75) at different magnifications.

**Figure S4**

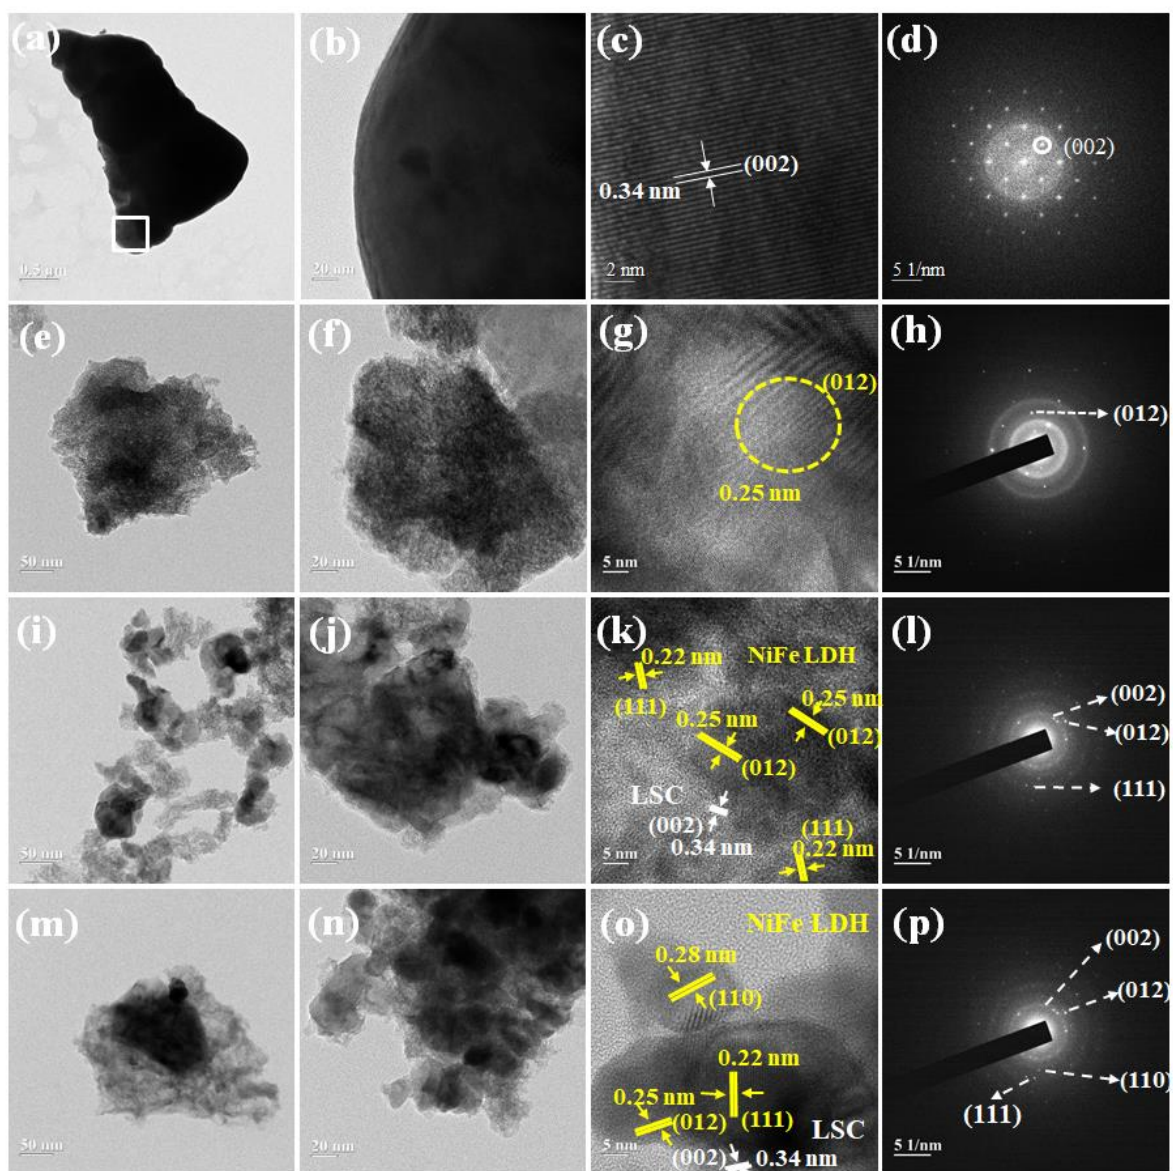

Figure S4. HREM micrographs of (a-d) LSC; (e-h) LSC/LDH (75/25), (i-l) LSC/LDH (50/50) and (m-p) LSC/LDH (25/75) and the corresponding SAED pattern.

Figure S5

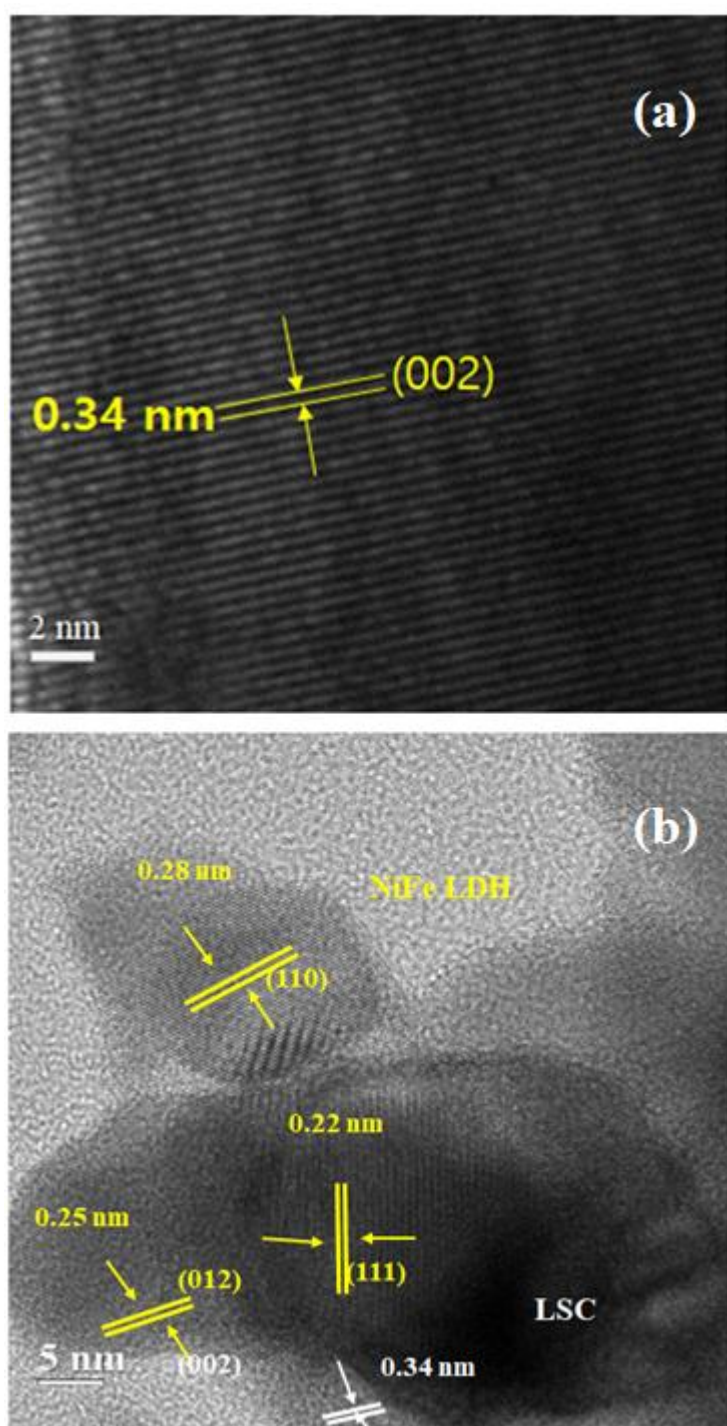

Figure S5. High resolution TEM micrographs of (a) LSC and (b) LSC/LDH (25/75) composite.



**Figure S6**

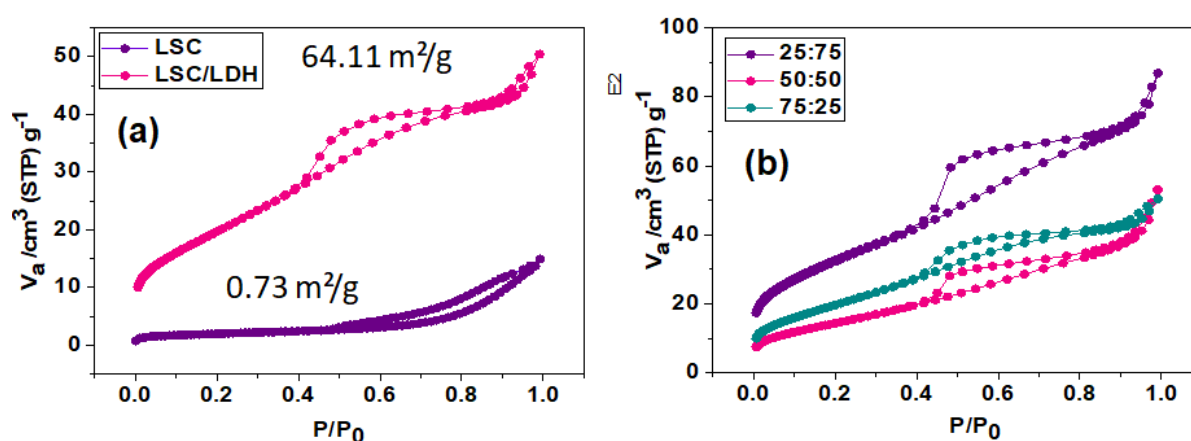

**Table S1**

| Perovskite composition | BET Surface Area $\text{m}^2/\text{g}$ | Pore Size $\text{\AA}$ | Pore Volume $\text{cm}^3/\text{g}$ |
|------------------------|----------------------------------------|------------------------|------------------------------------|
| 25                     | 107.4411                               | 28.548                 | 0.112817                           |
| 50                     | 47.4280                                | 33.193                 | 0.058208                           |
| 75                     | 64.1168                                | 27.810                 | 0.067206                           |

Figure S6. BET  $\text{N}_2$ -adsorption-desorption isotherms of (a) LSC and LSC/LDH (75/25); (b) LSC/LDH (75/25); LSC/LDH (50/50) and (c) LSC/LDH (25/75), comparatively; inset Table S1. Surface properties deduced from BET isotherms.



**Figure S7**

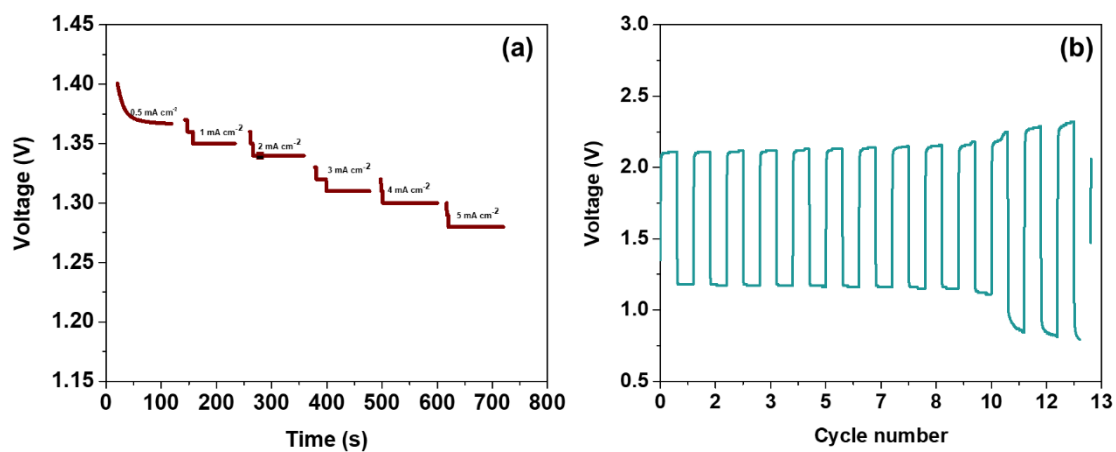

Figure S7. (a) Discharge rate capability of LSC/LDH (75/25) measured at different current densities; (b) Zinc air battery performance of pristine LSC measured at a constant current density of 5 mA cm<sup>-2</sup>.

**Figure S8**

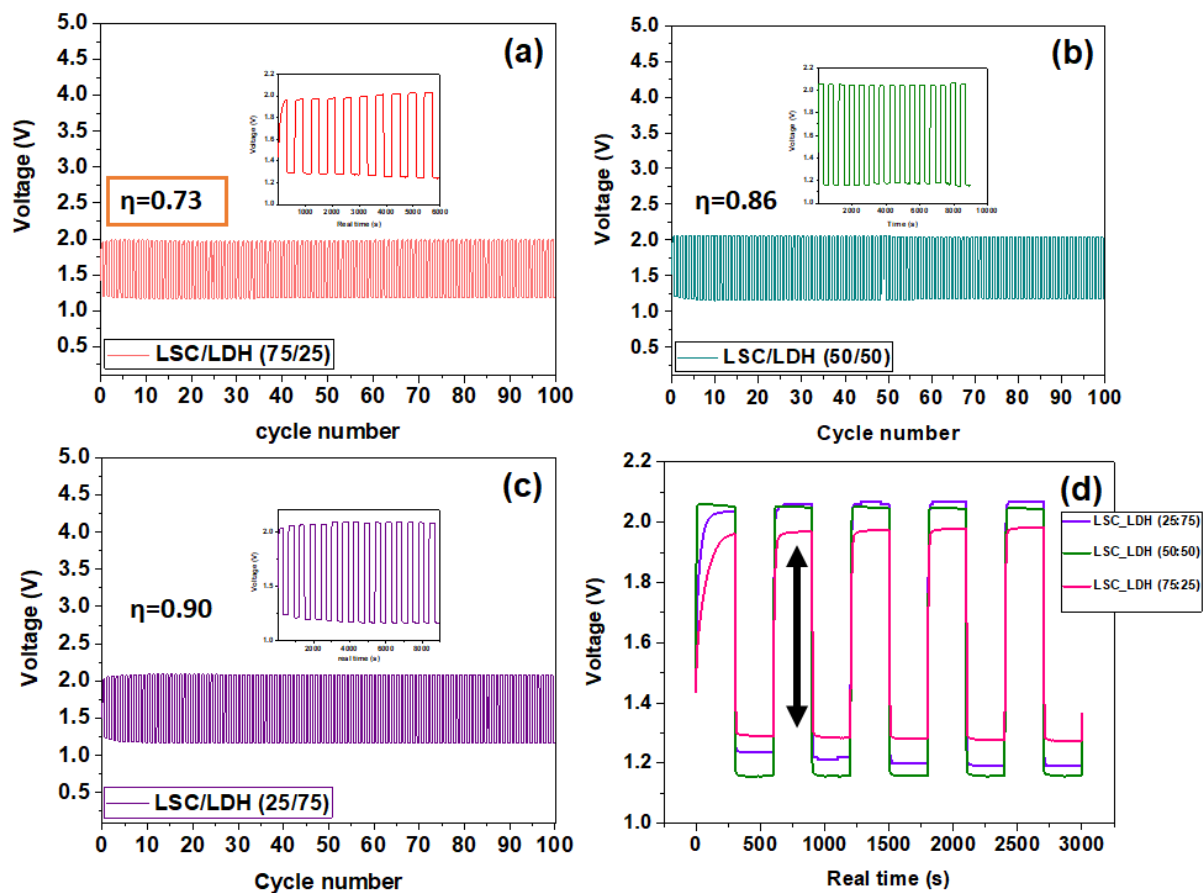

Figure S8. Zinc air battery performance measured at a constant current density of  $5 \text{ mA cm}^{-2}$  of (a) LSC/LDH (75/25); (b) LSC/LDH (50/50) and (c) LSC/LDH (25/75); and (d) comparison of first few cycles of (a-c).

**Figure S9**

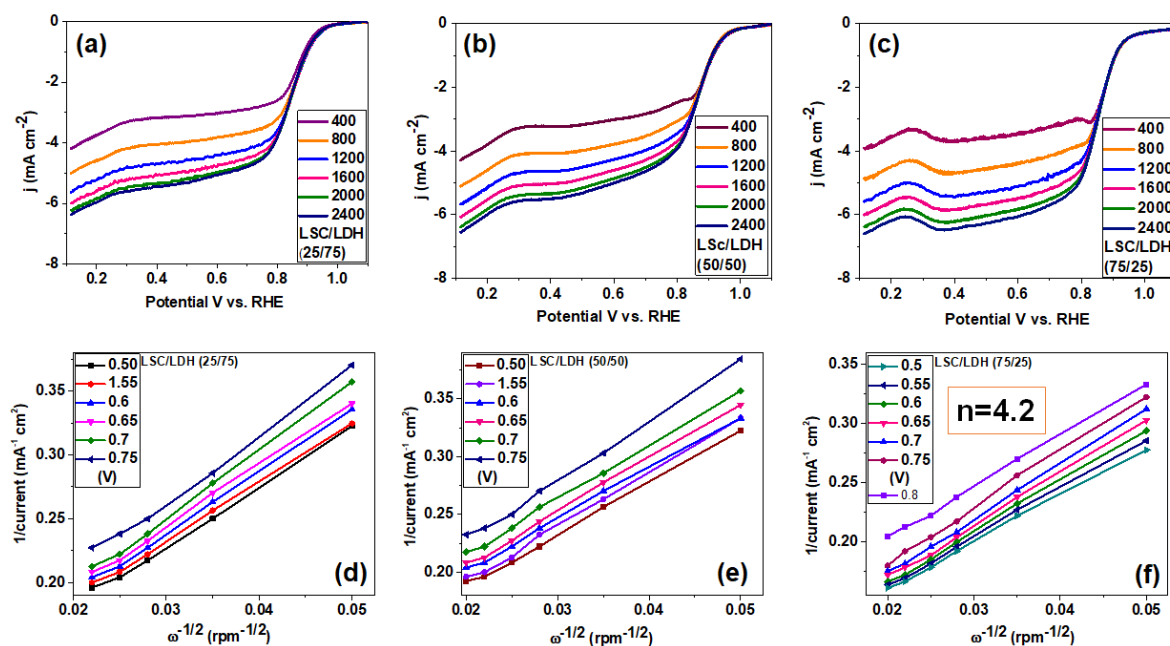

Figure S9. (a-c) The ORR polarization of (a) LSC/LDH (75/25); (b) LSC/LDH (50/50) and (c) LSC/LDH (25/75) measured by varying the rotation speed (400 to 2400 rpm); (d-f) corresponding Koutecky–Levich (K-L) plot of (a) LSC/LDH (75/25); (b) LSC/LDH (50/50) and (c) LSC/LDH (25/75).

Figure S10

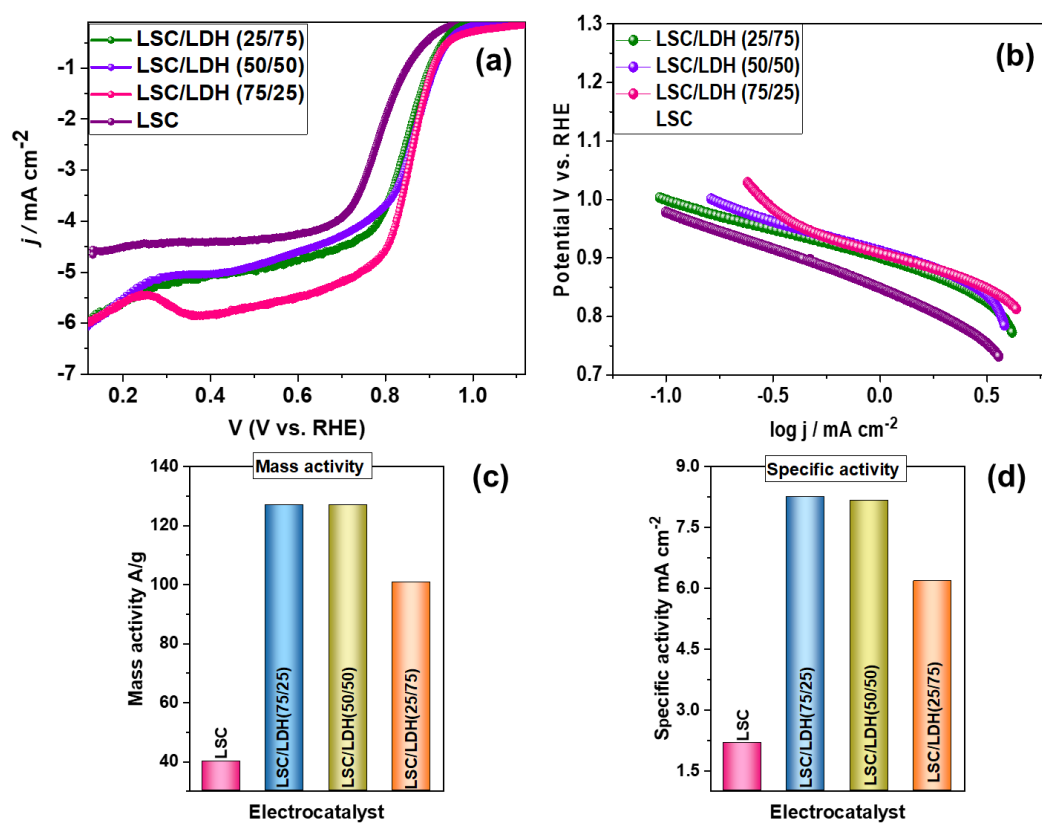

Figure S10. The ORR polarization of (a) LSC/LDH (75/25); (b) LSC/LDH (50/50) and (c) LSC/LDH (25/75) comparatively; (b) Tafel slope values obtained from (a); (c, d) mass activity (MA) A g<sup>-1</sup> and specific activity (SA) mA cm<sup>-2</sup> calculated from (a).

**Figure S11**

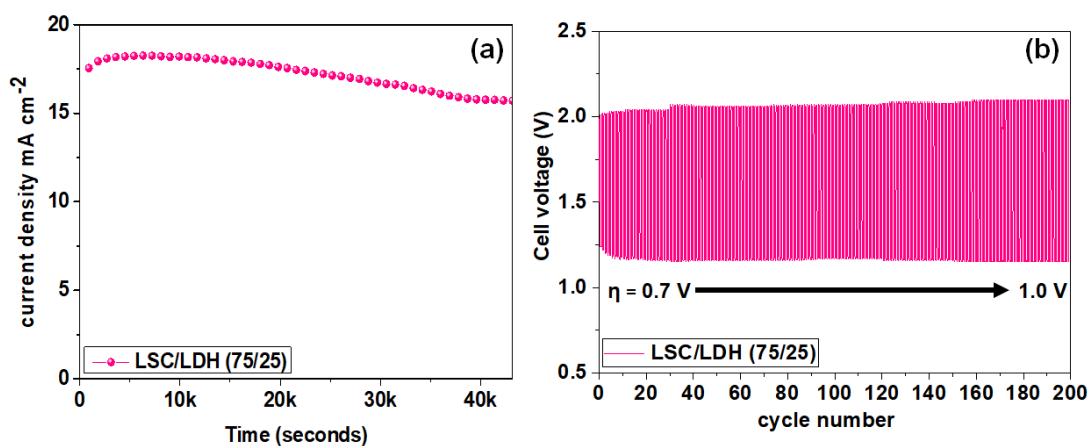

Figure S11. (a) Chronoamperometric durability test of LSC/LDH (75/25) recorded at 10 mA cm<sup>-2</sup> for 12 h, (b) Zinc air battery performance of LSC/LDH (75/25) measured at a constant current density of 5 mA cm<sup>-2</sup> for 200 cycles.

**Figure S12**

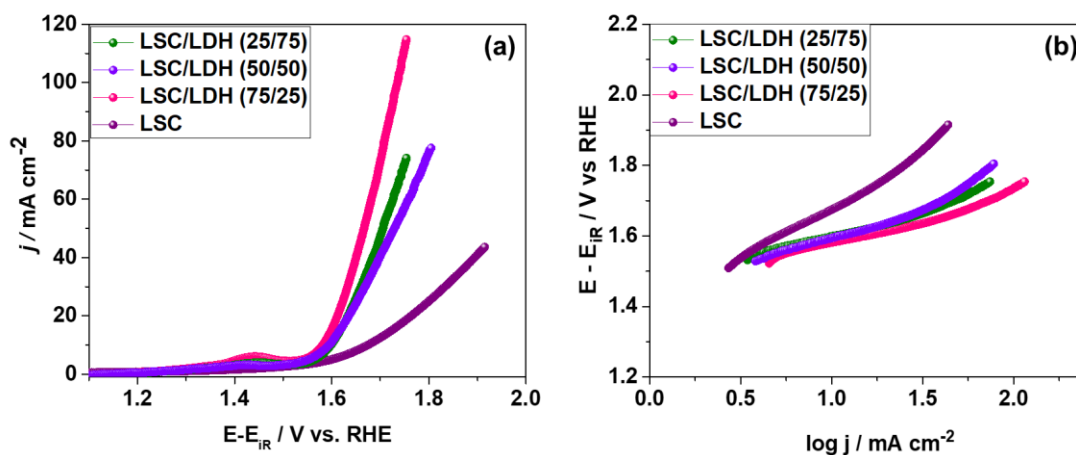

Figure S12. The OER polarization of (a) LSC/LDH (75/25), LSC/LDH (50/50) and LSC/LDH (25/75) in comparison to LSC; (b) Tafel slope values obtained from (a).

**Figure S13**

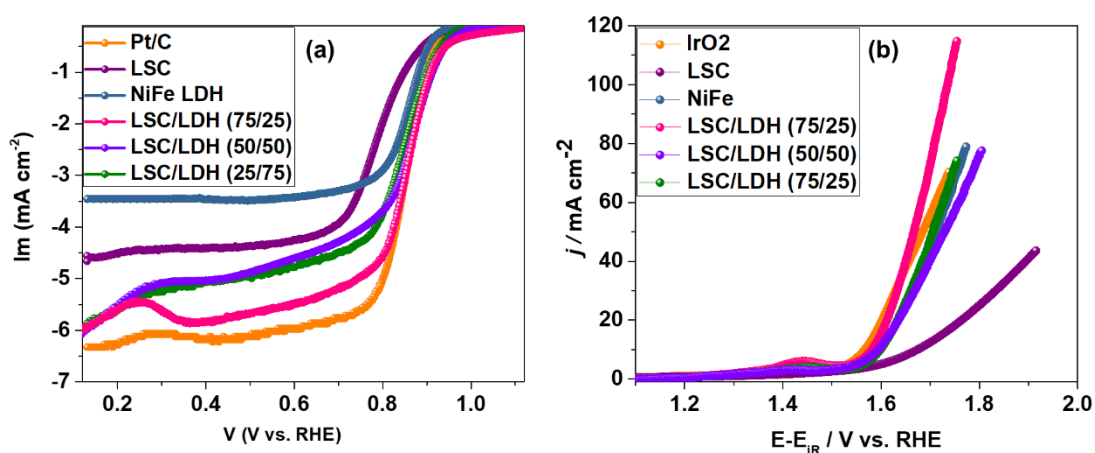

Figure S13. (a) ORR and (b) OER polarization of all the individual material with respect to Pt/C and IrO<sub>2</sub>, respectively.

**Figure S14**

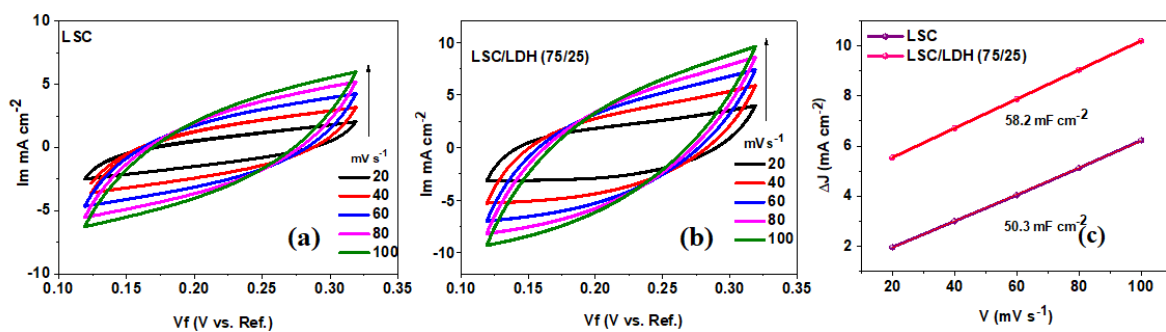

Figure S14. (a, b) CV cycles recorded at different scan rates and (c) the calculated ECSA of OER catalysts from (a) LSC and (b) LSC/LDH (75/25).



**Table S1** XPS parameters of LSC and LSC/LDH (75/25)

| Name               |             |        | Binding energy eV  |             |        |
|--------------------|-------------|--------|--------------------|-------------|--------|
| Name               |             |        | Binding energy eV  |             |        |
| La3d               | 3d5/2       | 833.32 | La3d               | 3d5/2       | 835.2  |
|                    | 3d3/2       | 837.2  |                    | 3d3/2       | 851    |
|                    |             | 849.8  |                    |             |        |
|                    |             | 854    |                    |             |        |
| Sr3d               | 3d5/2       | 132.95 | Sr3d               | 3d5/2       | 133.4  |
|                    | 3d3/2       | 134.4  |                    | 3d3/2       | 135.1  |
| Co2p               | 2p3/2       | 778.54 | Co2p               | 2p3/2       | 780.65 |
| $Co^{3+}, Co^{2+}$ | 2p1/2       | 794.1  | $Co^{3+}, Co^{2+}$ | 2p1/2       | 796.1  |
| O1s                | 1s lattice  | 528.61 | O1s                | 1s adsorbed | 530    |
|                    | 1s adsorbed | 530.6  |                    |             | 531.23 |
|                    |             |        | Ni2p               | 2p3/2       | 852    |
|                    |             |        | $Ni^{2+}$          |             | 855.5  |
|                    |             |        | Fe2p               | 2p3/2       | 712.8  |
|                    |             |        | $Fe^{2+}$          |             | 725    |

**Table S2 Zn–air battery Performance of featuring perovskite oxide-based air cathodes**

| <b>Electrocatalysts</b>                                                                       | <b>Application</b>                                  | <b>Overpotential</b> | <b>References</b>                                                |
|-----------------------------------------------------------------------------------------------|-----------------------------------------------------|----------------------|------------------------------------------------------------------|
| <b>CMO/S Catalyst</b>                                                                         | <b>Zinc-air battery<br/>@ 5 mA cm<sup>-2</sup></b>  | <b>0.67</b>          | <b>Adv. Energy Mater.<br/>2018, 8, 1800612</b>                   |
| <b>Pt-SCFP/C-12</b>                                                                           | <b>Zinc-air battery<br/>@ 5 mA cm<sup>-2</sup></b>  | <b>0.77</b>          | <b>Adv. Energy Mater.<br/>2020, 10, 1903271</b>                  |
| <b>MnO<sub>2</sub>/La<sub>0.7</sub>Sr<sub>0.3</sub>MnO<sub>3</sub></b>                        | <b>Zinc-air battery<br/>@ 10 mA cm<sup>-2</sup></b> | <b>0.79</b>          | <b>ACS Appl. Mater.<br/>Interfaces 2019, 11,<br/>25870–25881</b> |
| <b>LSMF</b>                                                                                   | <b>Zinc-air battery<br/>@ 5 mA cm<sup>-2</sup></b>  | <b>0.8</b>           | <b>Applied Energy 251<br/>(2019) 113406</b>                      |
| <b>NdBa<sub>0.5</sub>Sr<sub>0.5</sub>Co<sub>1.5</sub>Fe<sub>0.5</sub><br/>O<sub>5+δ</sub></b> | <b>Zinc-air battery<br/>@ 1 mA cm<sup>-2</sup></b>  | <b>0.7</b>           | <b>J. Mater. Chem. A,<br/>2019,7, 24231-24238</b>                |
| <b>PBSCN1</b>                                                                                 | <b>Zinc-air battery<br/>@ 1 mA cm<sup>-2</sup></b>  | <b>~0.8</b>          | <b>ChemElectroChem<br/>2019, 6, 3154 –3159</b>                   |
| <b>LMCO</b>                                                                                   | <b>Zinc-air battery</b>                             | <b>0.8</b>           | <b>Inorg. Chem. 2019, 58,<br/>12, 8208–8214</b>                  |
| <b>BSCF/NiFe</b>                                                                              | <b>Zinc-air battery<br/>@ 5 mA cm<sup>-2</sup></b>  | <b>0.89</b>          | <b>ACS Appl. Mater.<br/>Interfaces 2019, 11, 39</b>              |
| <b>PrBa<sub>0.5</sub>Sr<sub>0.5</sub>Co<sub>2-x</sub>Fe<sub>x</sub>O<sub>5+δ</sub></b>        | <b>Zinc-air battery<br/>@ 10 mA cm<sup>-2</sup></b> | <b>0.8</b>           | <b>ACS Nano 2017, 11,<br/>11, 11594–11601</b>                    |
| <b>La<sub>0.7</sub>50nm</b>                                                                   | <b>Zinc-air battery<br/>@ 10 mA cm<sup>-2</sup></b> | <b>0.75</b>          | <b>Energy Environ. Sci.,<br/>2016,9, 176-183</b>                 |
| <b>LSC/LDH (NiFe)</b>                                                                         | <b>Zinc-air battery<br/>@ 5 mA cm<sup>-2</sup></b>  | <b>0.73</b>          | <b>This work</b>                                                 |
